# Supplementary material
Source: PubMed Central journal article supplement (PMC6497536)
Supplement: NIHMS1504867-supplement-1.pdf [file NIHMS1504867-supplement-1.pdf]

**Table S1. Incidence and risk factors of cataracts after hematopoietic cell transplantation.**

| Author<br>Study type<br>Study year                               | Number of patients<br>HCT type<br>Disease type                     | Conditioning<br>regimen (N)                    | Cataract<br>N (%)                                                                                                    | Duration<br>of follow-<br>up (years) | Notes                                                                                                                                                                                                                                                                               |
|------------------------------------------------------------------|--------------------------------------------------------------------|------------------------------------------------|----------------------------------------------------------------------------------------------------------------------|--------------------------------------|-------------------------------------------------------------------------------------------------------------------------------------------------------------------------------------------------------------------------------------------------------------------------------------|
| <b>Adult studies</b>                                             |                                                                    |                                                |                                                                                                                      |                                      |                                                                                                                                                                                                                                                                                     |
| Tichelli et al <sup>1</sup><br>Single center<br>1979- 1991       | 197<br>Allo 174, Syngeneic 5,<br>Auto 18                           | S-TBI (74)<br>F-TBI (90)<br>Chemotherapy (33)  | <b>70 (36%)</b><br>S-TBI (100%)<br>F-TBI (20%)<br>Chemotherapy (3%)                                                  | 0.2- 5.2                             | - <u>Risk factors:</u> Use of irradiation, mode of irradiation, steroid use > 3 months                                                                                                                                                                                              |
| Bray et al <sup>2</sup><br>Single center<br>1983- 1989           | 41<br>Allo 17, Auto 24                                             | F-TBI (30)<br>Chemotherapy (11)                | <b>20 (49%)</b><br>F-TBI (63%)<br>Chemotherapy (9%)                                                                  | Allo 0.6- 7<br>Auto 0.5-<br>5.2      | - Incidence by HCT type: Allo (71%),<br>Auto (33%)<br>- <u>Risk factors:</u> Dose of TBI, rate of TBI administration                                                                                                                                                                |
| Belkacemi et al <sup>3</sup><br>Multicenter (EBMT)<br>Up to 1996 | 1063<br>Allo 688, Auto 375<br>AML, ALL, AUL                        | S-TBI (495)<br>F-TBI (568)                     | <b>257 (24%)</b><br>S-TBI (35%)<br>F-TBI (14%)<br><br>Incidence at 10 years: 50%                                     | 1- 17.1                              | - 10 year estimated cataract incidence by HCT type: Allo (65%) vs Auto (46%) (p=0.0018)<br>- <u>Risk factors:</u> Age > 23, higher dose rate of TBI (>0.04 Gy/ min), Allo HCT, steroids >100 days,<br>- <u>Protective factors:</u> F-TBI, Heparin in S-TBI                          |
| Baker et al <sup>4</sup><br>Multicenter (BMTSS)<br>1974- 1998    | 248<br>Allo 220, Auto 28<br>CML                                    | TBI (233)<br>Chemotherapy (14)                 | <b>95 (38%)</b>                                                                                                      | 2- 27                                | - Cataract odds ratio 15.3 (95% CI 2.4-6.4) compared to siblings (p<0.001)<br>- Incidence by cGVHD: Yes (61%) vs No (41%),<br>- Incidence by HCT type: Allo (40%) vs Auto (21%) (p= 0.01)<br>- 15-year cumulative incidence: 53% (Auto), 63% (related donor), 67% (unrelated donor) |
| Benyunes et al <sup>5</sup><br>Single center<br>1969-1981        | 492<br>Allo 480, Auto12<br>AML, ALL, CML,<br>Lymphoma, SAA, Others | S-TBI (74)<br>F-TBI (333)<br>Chemotherapy (85) | <b>159 (32%)</b><br>Incidence at 11 years:<br>S-TBI (85%)<br>>12 Gy F-TBI (50%)<br>12 Gy F-TBI (34%)<br>No TBI (19%) | 2-18                                 | - Incidence by steroids exposure: Yes (45%) vs No (38%) (P <0.001)<br>- <u>Risk factor:</u> S-TBI<br>- <u>Protective factor:</u> No TBI                                                                                                                                             |
| Deeg et al <sup>6</sup><br>Single center<br>1969- 1981           | 277<br>Allo<br>SAA, ALL, AML, CML,<br>NHL, others                  | S-TBI (105)<br>F-TBI (76)<br>Chemotherapy (96) | <b>86 (31%)</b><br>S-TBI (55%)<br>F-TBI (16%)<br>Chemotherapy (17%)                                                  | 1-12                                 | - <u>Risk factors:</u> S-TBI [4.7-fold higher risk than F-TBI or Chemotherapy (p <0.001)], chronic steroid use, diagnosis of ALL, CML                                                                                                                                               |
| Zierhut et al <sup>7</sup><br>Single center<br>1982-1994         | 85 Auto<br>AML, ALL, lymphoma                                      | F-TBI                                          | <b>28 (33%)</b><br>Incidence at 13 years: 54%                                                                        | 1.7-13                               |                                                                                                                                                                                                                                                                                     |

CIBMTR/EBMT Non-GVHD Ocular Complications Supplement

|                                                                  |                                                                    |                                               |                                                                           |                                  |                                                                                                                            |
|------------------------------------------------------------------|--------------------------------------------------------------------|-----------------------------------------------|---------------------------------------------------------------------------|----------------------------------|----------------------------------------------------------------------------------------------------------------------------|
| Bieri et al <sup>8</sup><br>Single center<br>1984- 2004          | 142 Allo<br>AML, ALL, CML, MDS,<br>MM, MPS                         | TBI (121)<br>Chemotherapy (21)                | <b>31 (22%)</b><br>Incidence at 10 years: 34%                             | > 2                              |                                                                                                                            |
| Dunn et al <sup>9</sup><br>Single center<br>1978-1991            | 366<br>Allo 293, Auto 73<br>AML, ALL, CML,<br>Lymphoma, Other, SAA | TBI (185)<br>Chemotherapy (181)               | <b>40 (11%)</b>                                                           | 0-12.5                           | - <u>Risk factors</u> : total dose and duration of corticosteroids                                                         |
| <b>Pediatric studies</b>                                         |                                                                    |                                               |                                                                           |                                  |                                                                                                                            |
| Suh et al <sup>10</sup><br>Single center<br>1981-1996            | 104<br>Allo 95, Auto 9<br>AML, SAA, ALL, others                    | F-TBI                                         | <b>24 (23%)</b>                                                           | 0-15                             | - Incidence by HCT type: Allo- 24%,<br>Auto- 11%<br>- <u>Risk factor</u> : chronic GVHD                                    |
| Levy et al <sup>11</sup><br>Single center<br>1994-2010           | 15 Allo<br>ALL, AML, NHL                                           | F-TBI                                         | <b>9 (69%)</b>                                                            | 1.4-13                           |                                                                                                                            |
| Frisk et al <sup>12</sup><br>Single center<br>1985-1994          | 29<br>Auto 28, syngeneic 1<br>ALL, AML, Lymphoma                   | S-TBI (20)<br>F-TBI (1)<br>Chemotherapy (8)   | <b>22 (76%)</b><br>TBI (100%)<br>Chemotherapy (12%)                       | 4-10                             | - <u>Risk factor</u> : TBI                                                                                                 |
| Ricardi et al <sup>13</sup><br>Single center                     | 51<br>Allo 32, Auto 19<br>AML, ALL, CML, NHL                       | F-TBI                                         | <b>36 (72%)</b>                                                           | 5.1-17.9                         | - Incidence by HCT type: Allo (84%) vs<br>Auto (53%) (p=0.02)<br>- <u>Risk factor</u> : AlloHCT                            |
| Fahnehjelm et al <sup>14</sup><br>Single center<br>1986-2004     | 79 Allo<br>ALL, AML, CML, MDS,<br>JMML, SAA, Non-<br>malignant     | S-TBI (17)<br>F-TBI (18)<br>Chemotherapy (44) | <b>46 (58%)</b><br>S-TBI (100%)<br>F-TBI (83%)<br>Chemotherapy only (34%) | 2-18                             | - <u>Risk factor</u> : S-TBI                                                                                               |
| Fahnehjelm et al <sup>15</sup><br>Single center<br>1986-2012     | 131 Allo<br>Leukemia, MDS, non-<br>malignant                       | S-TBI (17)<br>F-TBI (36)<br>Chemotherapy (86) | <b>65 (50%)</b>                                                           | 1-19.4                           | <u>Risk factors</u> : TBI (HR 25.9, 95% CI<br>8.29-81.26, p < 0.001), malignancy (HR<br>5.38, 95% CI 3.02-9.56, p < 0.001) |
| Kinori et al <sup>16</sup><br>Single center<br>2001-2008         | 23 Allo<br>AML, MDS, CML, non-<br>malignant                        | Chemotherapy                                  | <b>1 (4%)</b>                                                             | 0.3-9.7                          | 40% had <2 years follow-up                                                                                                 |
| Ng et al <sup>17</sup><br>Single center<br>1991-1995             | 57<br>Allo 47, Auto 10<br>ALL, Beta thalassemia<br>major, CML      | F-TBI (56)                                    | <b>4 (14%)</b>                                                            | 0.2-4.5                          |                                                                                                                            |
| Holmstrom et al <sup>18</sup><br>Single center<br>1987-1994      | 45<br>Allo 42, Auto 3<br>AML, ALL, CML, HLH,<br>MDS, SAA           | F-TBI (21)<br>Chemotherapy (24)               | <b>25 (56%)</b><br>F-TBI: 20 (95%)<br>Chemotherapy: 5 (21%)               | F-TBI: 2-9<br>Chemotherapy: 3-10 | - <u>Risk factors</u> : TBI, busulfan                                                                                      |
| Callissendorff et al <sup>19</sup><br>Single center<br>1978-1989 | 61 Allo<br>Leukemia, SAA, others                                   | F-TBI (43)<br>Chemotherapy (18)               | <b>44 (72%)</b><br>F-TBI (100%)<br>Chemotherapy (0)                       | 1-10                             | - <u>Risk factor</u> : TBI                                                                                                 |

S-TBI, single dose TBI; F-TBI, fractionated TBI.

**Table S2. Treatment of cataracts after hematopoietic cell transplantation**

| Author<br>Study type<br>Study year                           | Number of Patients<br>Patient age at HCT    | Cataract<br>N (%)                               | Duration of follow-up<br>(years)                               | Treatment of Cataracts                                                                                                                                                                                                                                                                                                                                           |
|--------------------------------------------------------------|---------------------------------------------|-------------------------------------------------|----------------------------------------------------------------|------------------------------------------------------------------------------------------------------------------------------------------------------------------------------------------------------------------------------------------------------------------------------------------------------------------------------------------------------------------|
| Najima et al <sup>20</sup><br>Single center<br>1986-2006     | 622 (ADULTS)<br>Median age 36 y<br>Allo 622 | 45/661 (8.02%)                                  | Median 836 days (0-7316)                                       | - 13 of 45 (29%) underwent phacoemulsification and intraocular lens implantation<br>- Mean interval from HCT to surgery 1028 days<br>- Median age at surgery 42 y<br>- Complication of posterior capsule opacification in 6/13                                                                                                                                   |
| Fahnehjelm et al <sup>15</sup><br>Single center<br>1986-2012 | 139 (PEDIATRICALS)<br>Median age 6.6 y      | 50% developed cataracts at 10.2 years after HCT | Median 8 y (1.0-19.4)                                          | - 19/131 had surgery<br>- Median age at surgery 20.4 years (range 14.7–24.5)<br>- Mean 11.6 y, median 11.4 y (range 3.3-21) after HCT<br>- Of 35 operated eyes, 13 (37%) required further treatment with laser or re-operation due to secondary cataract.                                                                                                        |
| De Melo et al <sup>21</sup><br>Single Center<br>2006 - 2011  | 261 (ADULT)<br>Mean age 56 y                | 41/261 (15.7%)                                  | Mean 55 weeks (40-201)                                         | - Posterior subcapsular cataracts seen only in patients less than 45 years.<br>- Mean interval from HCT to surgery 14 weeks (34-299)<br>- All patients underwent cataract extraction with phacoemulsification using temporal clear corneal, suture less incisions.<br>- Cystoid macular edema was most common post-operative complication seen in 4 (5.6%) eyes. |
| Vaidya et al <sup>22</sup><br>Single Center<br>1984 - 1996   | 31 (PEDIATRICALS)<br>Median age 8 y (5–20)  | 12/31(38.7%)                                    | Median 7.64 y (0.56–14.2)                                      | - 12 who developed cataracts needed surgery                                                                                                                                                                                                                                                                                                                      |
| Aristei et al <sup>23</sup><br>Single center<br>1985 - 1998  | 193 (ADULT)<br>Median age 33 y (2-59)       | S-TBI 18/86 (21%)<br>F-TBI 14/107 (13%)         | Median<br>S-TBI 3.02 y (1.13–7.28)<br>F-TBI 7.56 y (1.14–14.9) | - Median time to cataract<br>S-TBI 2.52 y after HCT, 11 (61.1%) had surgery<br>F-TBI 7.6 y after HCT, 2 (14.3%) had surgery                                                                                                                                                                                                                                      |
| Horowitz et al <sup>24</sup><br>Multi-center<br>2004 - 2010  | 308 (PEDIATRICALS)<br>Mean age 8.7 y        | 113/308 (41.7%)                                 | Mean 10.3 y                                                    | - Median time to cataract 5.3 y after HCT<br>- 9/113 (8.1%) had cataract surgery at a median of 3.8 years after cataract diagnosis (IQR 2.2-4.7).                                                                                                                                                                                                                |

S-TBI, single dose TBI; F-TBI, fractionated TBI.

**Table S3. Ocular complications of the posterior segment after hematopoietic cell transplantation**

| Author                        | Year | N   | Study                                        | Ophthalmological evaluation                                                        | Findings                                                                                                                | Risk factors                                        |
|-------------------------------|------|-----|----------------------------------------------|------------------------------------------------------------------------------------|-------------------------------------------------------------------------------------------------------------------------|-----------------------------------------------------|
| Hirst et al <sup>25</sup>     | 1983 | 45  | Children/adults<br>Prospective               | All patients underwent visual acuity tests, slit-lamp and fundus.                  | No patients with microvasculopathy were reported                                                                        |                                                     |
| Bernauer et al <sup>26</sup>  | 1991 | 127 | Adults<br>Prospective<br>Allo/auto HCT       | All patients underwent visual acuity tests, slit-lamp examination and fundus.      | 13 patients (10%) microcirculation changes                                                                              | TBI, cyclosporine                                   |
| Coskuncan et al <sup>27</sup> | 1994 | 397 | Retrospective<br>Allo HCT                    | Ophthalmological evaluation                                                        | 17 patients (4.3%) cotton-wool spots, 11 patients (2.8%) optic disc edema, 14 patients (3.5%) hemorrhagic complications | TBI, chronic GHVD, cyclosporine                     |
| Johnson et al <sup>28</sup>   | 1999 | 140 | Adults<br>Prospective<br>Auto HCT            | All included patients underwent visual acuity test, and fundus.                    | 10 patients (7%) cotton wool spots / optic disc edema                                                                   | Carmustine                                          |
| Bylsma et al <sup>29</sup>    | 2001 | 399 | Adults<br>Retrospective<br>Allo HCT          | Ophthalmological evaluation on demand<br>Fundus<br>Angiography                     | 4 patients (1%) late retinal microvasculopathy (mean 50 months after HCT)                                               | Busulfan + Cyclophosphamide, Cyclophosphamide + TBI |
| Tabbara et al <sup>30</sup>   | 2009 | 620 | Children/adults<br>Retrospective<br>Allo HCT | Ophthalmological evaluation on demand                                              | No patients with microvasculopathy were reported                                                                        |                                                     |
| Westeneng et al <sup>31</sup> | 2010 | 101 | Prospective<br>Allo HCT                      | All included patients underwent ophthalmological evaluation                        | 1 patient unilateral visual loss due IMR                                                                                | GVHD                                                |
| Ivanir et al <sup>32</sup>    | 2013 | 111 | Prospective<br>Allo HCT                      | All included patients underwent visual acuity tests. Slit-lamp examination, fundus | No patients with microvasculopathy                                                                                      |                                                     |

## References

1. Tichelli A, Gratwohl A, Egger T, et al. Cataract formation after bone marrow transplantation. *Ann Intern Med.* 1993;119:1175-1180.
2. Bray LC, Carey PJ, Proctor SJ, Evans RG, Hamilton PJ. Ocular complications of bone marrow transplantation. *Br J Ophthalmol.* 1991;75:611-614.
3. Belkacemi Y, Labopin M, Vernant JP, et al. Cataracts after total body irradiation and bone marrow transplantation in patients with acute leukemia in complete remission: a study of the European Group for Blood and Marrow Transplantation. *Int J Radiat Oncol Biol Phys.* 1998;41:659-668.
4. Baker KS, Gurney JG, Ness KK, et al. Late effects in survivors of chronic myeloid leukemia treated with hematopoietic cell transplantation: results from the Bone Marrow Transplant Survivor Study. *Blood.* 2004;104:1898-1906.
5. Benyunes MC, Sullivan KM, Deeg HJ, et al. Cataracts after bone marrow transplantation: long-term follow-up of adults treated with fractionated total body irradiation. *Int J Radiat Oncol Biol Phys.* 1995;32:661-670.
6. Deeg HJ, Flournoy N, Sullivan KM, et al. Cataracts after total body irradiation and marrow transplantation: a sparing effect of dose fractionation. *Int J Radiat Oncol Biol Phys.* 1984;10:957-964.
7. Zierhut D, Lohr F, Schraube P, et al. Cataract incidence after total-body irradiation. *Int J Radiat Oncol Biol Phys.* 2000;46:131-135.
8. Bieri S, Roosnek E, Ozsahin H, et al. Outcome and risk factors for late-onset complications 24 months beyond allogeneic hematopoietic stem cell transplantation. *Eur J Haematol.* 2011;87:138-147.
9. Dunn JP, Jabs DA, Wingard J, Enger C, Vogelsang G, Santos G. Bone marrow transplantation and cataract development. *Arch Ophthalmol.* 1993;111:1367-1373.
10. Suh DW, Ruttum MS, Stuckenschneider BJ, Mieler WF, Kivlin JD. Ocular findings after bone marrow transplantation in a pediatric population. *Ophthalmology.* 1999;106:1564-1570.
11. Mulcahy Levy JM, Tello T, Giller R, et al. Late effects of total body irradiation and hematopoietic stem cell transplant in children under 3 years of age. *Pediatr Blood Cancer.* 2013;60:700-704.
12. Frisk P, Hagberg H, Mandahl A, Soderberg P, Lonnerholm G. Cataracts after autologous bone marrow transplantation in children. *Acta Paediatr.* 2000;89:814-819.

13. Ricardi U, Filippi AR, Biasin E, et al. Late toxicity in children undergoing hematopoietic stem cell transplantation with TBI-containing conditioning regimens for hematological malignancies. *Strahlenther Onkol.* 2009;185 Suppl 2:17-20.
14. Fahnehjelm KT, Tornquist AL, Olsson M, Winiarski J. Visual outcome and cataract development after allogeneic stem-cell transplantation in children. *Acta Ophthalmol Scand.* 2007;85:724-733.
15. Tear Fahnehjelm K, Tornquist AL, Olsson M, Backstrom I, Andersson Gronlund M, Winiarski J. Cataract after allogeneic hematopoietic stem cell transplantation in childhood. *Acta Paediatr.* 2016;105:82-89.
16. Kinori M, Bielora B, Souroujon D, Hutt D, Ben-Bassat Mizrahi I, Huna-Baron R. Ocular complications in children after hematopoietic stem cell transplantation without total body irradiation. *Graefes Arch Clin Exp Ophthalmol.* 2015;253:1397-1402.
17. Ng JS, Lam DS, Li CK, et al. Ocular complications of pediatric bone marrow transplantation. *Ophthalmology.* 1999;106:160-164.
18. Holmstrom G, Borgstrom B, Calissendorff B. Cataract in children after bone marrow transplantation: relation to conditioning regimen. *Acta Ophthalmol Scand.* 2002;80:211-215.
19. Calissendorff BM, Bolme P. Cataract development and outcome of surgery in bone marrow transplanted children. *Br J Ophthalmol.* 1993;77:36-38.
20. Najima Y, Kakihana K, Ohashi K, et al. Incidence, risk factors, and clinical outcomes of cataracts following hematopoietic stem cell transplantation. *Am J Hematol.* 2011;86:508-510.
21. de Melo Franco R, Kron-Gray MM, De la Parra-Colin P, et al. Outcomes of cataract surgery in graft-versus-host disease. *Cornea.* 2015;34:506-511.
22. Vaidya SJ, Atra A, Bahl S, et al. Autologous bone marrow transplantation for childhood acute lymphoblastic leukaemia in second remission - long-term follow-up. *Bone Marrow Transplant.* 2000;25:599-603.
23. Aristei C, Alessandro M, Santucci A, et al. Cataracts in patients receiving stem cell transplantation after conditioning with total body irradiation. *Bone Marrow Transplant.* 2002;29:503-507.
24. Horowitz M. The role of registries in facilitating clinical research in BMT: examples from the Center for International Blood and Marrow Transplant Research. *Bone marrow transplantation.* 2008;42 Suppl 1:S1-S2.

25. Hirst LW, Jabs DA, Tutschka PJ, Green WR, Santos GW. The eye in bone marrow transplantation. I. Clinical study. *Arch Ophthalmol.* 1983;101:580-584.
26. Bernauer W, Gratwohl A, Keller A, Daicker B. Microvasculopathy in the ocular fundus after bone marrow transplantation. *Ann Intern Med.* 1991;115:925-930.
27. Coskuncan NM, Jabs DA, Dunn JP, et al. The eye in bone marrow transplantation. VI. Retinal complications. *Arch Ophthalmol.* 1994;112:372-379.
28. Johnson DW, Cagnoni PJ, Schossau TM, et al. Optic disc and retinal microvasculopathy after high-dose chemotherapy and autologous hematopoietic progenitor cell support. *Bone Marrow Transplant.* 1999;24:785-792.
29. Bylsma GW, Hall AJ, Szer J, West R. Atypical retinal microvasculopathy after bone marrow transplantation. *Clin Exp Ophthalmol.* 2001;29:225-229.
30. Tabbara KF, Al-Ghamdi A, Al-Mohareb F, et al. Ocular findings after allogeneic hematopoietic stem cell transplantation. *Ophthalmology.* 2009;116:1624-1629.
31. Westeneng AC, Hettinga Y, Lokhorst H, Verdonck L, van Dorp S, Rothova A. Ocular graft-versus-host disease after allogeneic stem cell transplantation. *Cornea.* 2010;29:758-763.
32. Ivanir Y, Shimoni A, Ezra-Nimni O, Barequet IS. Prevalence of dry eye syndrome after allogeneic hematopoietic stem cell transplantation. *Cornea.* 2013;32:e97-101.
